# Supplementary material for: Ecological networking of cystic fibrosis lung infections
Source: PubMed Central journal article supplement (PMC5460249; doi:10.1038/s41522-016-0002-1), 2016-12-02

**A**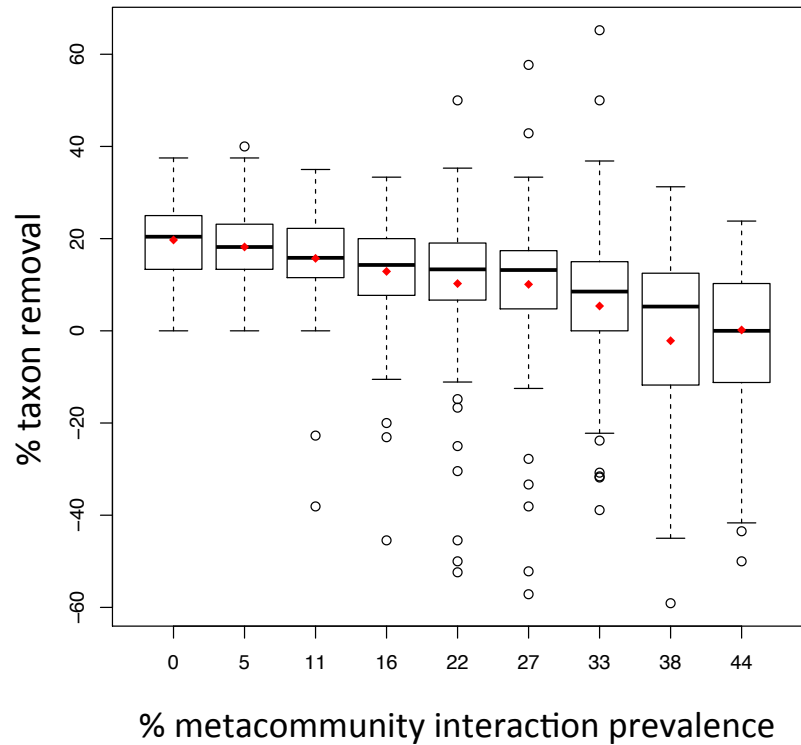**B**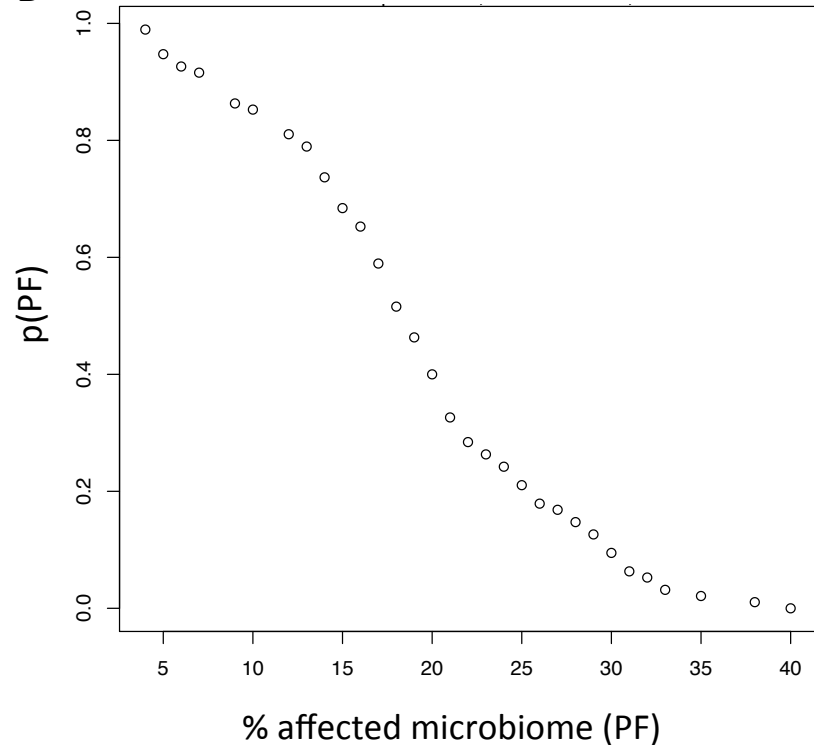

Supplement: 41522_2016_2_MOESM5_ESM.pdf [file 41522_2016_2_MOESM5_ESM.pdf]
